# Supplementary material for: Status of Quality Control for Laboratory Tests of Medical Institutions in Korea: Analysis of 10 Years of Data on External Quality Assessment Participation
Source: PubMed Central journal article supplement (PMC7349217; doi:10.3390/healthcare8020075), 2020-03-27
Supplement: healthcare-08-00075-s001.pdf [file healthcare-08-00075-s001.pdf]

**Supplemental Table S1.** List of low-complexity tests.

| Test                                                                                     | Current claim code (after 2018.1) | Previous claim code (until 2017.12) |
|------------------------------------------------------------------------------------------|-----------------------------------|-------------------------------------|
| C-Reactive Protein, Chemical reaction-instrument reading-handly                          | D0114*                            |                                     |
| MMP-9 [General immunoassay]-handly                                                       | D0120*                            | B0491 *                             |
| Amniotic fluid MMP-8 qualitative [POCT]                                                  | BZ011                             |                                     |
| Platelet drug responsiveness (aspirin) [POCT]                                            | BZ071                             |                                     |
| Platelet drug responsiveness (P2Y12)) [POCT]                                             | BZ072                             |                                     |
| Fecal Calprotectin, General immunoassay (1) qualitative-handly                           | D0131*                            | B0751 *                             |
| Fecal Calprotectin, General immunoassay (1) quantitative-handly                          | D0132*                            | B0753 *                             |
| Prothrombin Time -handly                                                                 | D1008*                            | B1541                               |
| Activated clotting time-handly                                                           | D1014*                            |                                     |
| Direct Bilirubin, Chemical reaction-instrument reading-handly                            | D1821*                            |                                     |
| Total Bilirubin, Chemical reaction-instrument reading-handly                             | D1831*                            |                                     |
| Total Protein, Chemical reaction-instrument reading-handly                               | D1841*                            |                                     |
| ALT Chemical reaction-instrument reading-handly                                          | D1851*                            |                                     |
| AST Chemical reaction-instrument reading-handly                                          | D1861*                            |                                     |
| Alkaline Phosphatase, Chemical reaction-instrument reading-handly                        | D1871*                            |                                     |
| Albumin, Chemical reaction-instrument reading-handly                                     | D1881*                            |                                     |
| γ-GTP, Chemical reaction-instrument reading-handly                                       | D1891*                            |                                     |
| Creatinine, Chemical reaction-instrument reading-handly                                  | D2281*                            |                                     |
| Uric Acid, Chemical reaction-instrument reading-handly                                   | D2311*                            |                                     |
| Neutrophil Gelatinase-Associated Lipocalin (NGAL), Precise immunoassay-handly            | D2341*                            | CZ247                               |
| Enzyme, Chemical reaction-instrument reading-handly (01) CPK                             | D2511*(01)                        |                                     |
| Lipid [Chemical reaction-instrument reading] 마. Triglyceride - handly                    | D2265*                            |                                     |
| Total Cholesterol, (2) Chemical reaction-instrument reading-handly                       | D2616*                            |                                     |
| HDL Cholesterol, (2) Chemical reaction-instrument reading-handly                         | D2618*                            |                                     |
| Ketone Body, Chemical reaction-instrument reading-handly                                 | D3012                             | C3861                               |
| Glucose [Chemical reaction-instrument reading] quantitative, glucometer                  | D3021                             | C3710                               |
| Hemoglobin A1c, General immunoassay-handly                                               | D3062                             |                                     |
| Gonadotropin, General immunoassay (qualitative) - handly (01) Luteinizing Hormone        | D3701(01)                         |                                     |
| Digestive Tract Enzyme, Chemical reaction-instrument reading-handly (01) Amylase (Total) | D3801*(01)                        |                                     |
| Troponin, General immunoassay (qualitative) - handly (01) Troponin I                     | D4021(01)                         |                                     |
| Troponin, General immunoassay (qualitative) - handly (02) Troponin T                     | D4021(02)                         |                                     |
| Troponin, Precise immunoassay (quantitative) - handly (01) Troponin I *                  | D4022*(01)                        | CY279                               |
| Troponin, Precise immunoassay (quantitative) - handly (02) Troponin T *                  | D4022*(02)                        |                                     |

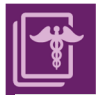

|                                                                                                                                            |            |         |
|--------------------------------------------------------------------------------------------------------------------------------------------|------------|---------|
| Cardiac Marker, Precise immunoassay-handy (01) Pro-Brain Natriuretic Peptide                                                               | D4061(01)  |         |
| Cardiac Marker, Precise immunoassay-handy (02) Brain Natriuretic Peptide                                                                   | D4061(02)  |         |
| Bladder Tumor Antigen, General immunoassay (qualitative) - handy (01) NMP22                                                                | D2221(01)  |         |
| Premature Rupture of Membrane Test, General immunoassay-handy (01) Phosphorylated Insulin-like Growth Factor Binding Protein-1 (phIGFBP-1) | D5711*(01) | B0114 * |
| Premature Rupture of Membrane Test, General immunoassay-handy (02) Insulin-Like Growth Factor Binding Protein-1                            | D5711*(02) | BX014   |
| Premature Rupture of Membrane Test, General immunoassay-handy (03) Placental Alpha-1 Microglobulin Protein                                 | D5711*(03) | B0562   |
| Premature Rupture of Membrane Test, General immunoassay-handy (04) qualitative Fetal Fibronectin                                           | D5711*(04) | BX013   |
| General immunoassay, Urine bacterial antigen-handy Urinary Antigen (01) Legionella                                                         | D1584*(01) | C5310   |
| General immunoassay, Urine bacterial antigen -handy Urinary Antigen (02) Streptococcus Pneumoniae *                                        | D1584*(02) | CZ398 * |
| Clostridium difficile toxin A·B, Glutamate dehydrogenase [Precise immunoassay]-handy                                                       | D5904*     | B4070 * |
| Malaria Antigen (Plasmodium lactate dehydrogenase) [Rapid test]                                                                            | CZ397*     | CZ397 * |
| HCV Rapid Antibody Test                                                                                                                    | CZ492*     | CZ492 * |
| Norovirus Antigen Test [Rapid Test]                                                                                                        | CZ493*     | CZ493 * |
| Hemoglobin A1c, Subfraction (03) chromatography-handy                                                                                      | D3064(03)  |         |
| Influenzavirus A·B antigen [POCT]                                                                                                          | CZ394      | CZ394   |
| HIV antibody [POCT]                                                                                                                        | CZ396*     | CZ396   |
| Urine Pregnancy Test, General immunoassay (qualitative)                                                                                    | D5701      | B0260   |
| Urine, Chemical reaction-visual reading †                                                                                                  | D2241      |         |
| Urinalysis [Chemical reaction-visual reading /Chemical reaction-instrument reading] Routine Urinalysis, Up to 4                            | D2251      | B0010   |
| Urinalysis [Chemical reaction-visual reading /Chemical reaction-instrument reading] Routine Urinalysis, Up to 7                            | D2252      | B0020   |
| Urinalysis [Chemical reaction-visual reading /Chemical reaction-instrument reading] Routine Urinalysis, Up to 10                           | D2253      | B0030   |

Abbreviation: POCT, point-of-care testing.

**Supplemental Table S2.** The number of medical institutions performing NHIS-supported public health checkups (excluding dental clinics, dental hospitals and public health center). Data were from the Korean Statistical Information Service (KOSIS, <http://kosis.kr/>).

| Year                                                   | 2009  | 2010  | 2011  | 2012  | 2013  | 2014  | 2015  | 2016  | 2017  | 2018   |
|--------------------------------------------------------|-------|-------|-------|-------|-------|-------|-------|-------|-------|--------|
| Clinics                                                | 5,040 | 6,113 | 6,620 | 7,026 | 7,315 | 7,573 | 7,872 | 8,240 | 8,448 | 8,658  |
| Long-term care hospitals and small to medium hospitals | 938   | 969   | 1,018 | 1,072 | 1,071 | 1,100 | 1,108 | 1,150 | 1,162 | 1,142  |
| General hospitals and tertiary hospitals               | 309   | 310   | 312   | 315   | 316   | 323   | 329   | 333   | 336   | 343    |
| Total                                                  | 6,287 | 7,392 | 7,950 | 8,413 | 8,702 | 8,996 | 9,309 | 9,723 | 9,946 | 10,143 |
